# Supplementary material for: Analysis of Antimicrobial Resistance in Non-typhoidal Salmonella Collected From Pork Retail Outlets and Slaughterhouses in Vietnam Using Whole Genome Sequencing
Source: Front Vet Sci. 2022 Mar 29;9:816279. doi: 10.3389/fvets.2022.816279 (PMC9002014; doi:10.3389/fvets.2022.816279)
Supplement: Supplementary Table 1 — Non-typhoidal isolates from slaughterhouses and retail outlets. ID, Unique strain identifier; Study, research study through which the isolates were obtained; Market/Slaughterhouse ID, unique anonymised retail outlet identifier; Kauffman and White Serotype, phenotypic serotype; SeqSero_fastq, Predicted NTS serotype using SeqSero algorithm using fastq data; ST, Multilocus serotype (MLST) sequence type derived from draft genome assemblies; aroC/dnaN/hemD/hisD/purE/sucA/thrA, MLST schema allele identifViers. [file Table_1.XLSX]

## Sheet: Sheet1
ID	Study	ValueChain	Province	District	Market/Slaughterhouse ID	Sampling date	Species	Kauffman and White Serotype	SeqSero_fastq	ST	aroC	dnaN	hemD	hisD	purE	sucA	thrA
PS39	PigRisk	Market	Nghe An	Do Luong	M11	2014-07-21	senterica	Enteritidis	Enteritidis	11	5	2	3	7	6	6	11
PS121	PigRisk	Market	Nghe An	Hung Nguyen	M07	2014-07-28	senterica	Unknown	London	155	10	60	58	66	6	65	16
PS136	PigRisk	Slaughterhouse	Nghe An	Dien Chau	Sl01	2014-08-04	senterica	London	London	155	10	60	58	66	6	65	16
PS213	PigRisk	Market	Nghe An	Dien Chau	M10	2014-08-05	senterica	Stanley	Stanley	29	16	16	20	18	8	12	18
PS234	PigRisk	Slaughterhouse	Hung Yen	Van Giang	Sl04	2014-08-22	senterica	Typhimurium	Typhimurium	19	10	7	12	9	5	9	2
PS258	PigRisk	Market	Hung Yen	Van Giang	M02	2014-08-27	senterica	Unknown	Weltevreden	365	130	97	25	125	84	9	101
PS281	PigRisk	Market	Hung Yen	Van Giang	M02	2014-08-27	senterica	Rissen	Rissen	469	92	107	79	156	64	151	87
PS403	PigRisk	Slaughterhouse	Nghe An	Hung Nguyen	Sl02	2014-10-14	senterica	Weltevreden	Weltevreden	365	130	97	25	125	84	9	101
PS411	PigRisk	Market	Nghe An	Hung Nguyen	M05	2014-10-14	senterica	Typhimurium	potential monophasic variant of Typhimurium	34	10	19	12	9	5	9	2
PS435	PigRisk	Market	Hung Yen	Tien Lu	M01	2014-10-17	senterica	Typhimurium	Typhimurium	19	10	7	12	9	5	9	2
PS563	PigRisk	Slaughterhouse	Hung Yen	Van Giang	Sl05	2014-11-11	senterica	Typhimurium	Typhimurium(O5-)	34	10	19	12	9	5	9	2
PS631	PigRisk	Market	Hung Yen	Tien Lu	M01	2014-12-10	senterica	Enteritidis	Enteritidis	11	5	2	3	7	6	6	11
PS671	PigRisk	Market	Hung Yen	Tien Lu	M03	2015-01-15	senterica	Enteritidis	Enteritidis	11	5	2	3	7	6	6	11
SL97	PigRisk	Market	Hung Yen	Tien Lu	M04	2014-05-06	senterica	Typhimurium	Typhimurium	19	10	7	12	9	5	9	2
SL105	PigRisk	Market	Hung Yen	Tien Lu	M08	2014-05-06	senterica	Typhimurium	Typhimurium	19	10	7	12	9	5	9	2
SL175	PigRisk	Market	Nghe An	Hung Nguyen	M06	2014-05-19	senterica	Typhimurium	potential monophasic variant of Typhimurium	34	10	19	12	9	5	9	2
SL195	PigRisk	Slaughterhouse	Nghe An	Hung Nguyen	Sl03	2014-05-20	senterica	Derby	Derby	40	19	20	3	20	5	22	22
SL372	PigRisk	Market	Hung Yen	Van Giang	M09	2014-06-12	senterica	Typhimurium	potential monophasic variant of Typhimurium	34	10	19	12	9	5	9	2
SL406	PigRisk	Slaughterhouse	Hung Yen	Van Giang	Sl05	2014-06-23	senterica	Typhimurium	potential monophasic variant of Typhimurium	{34}	10	19	12	9	~5	9	2	Single SNP variant of allele 5
SP1	SafePORK	Supermarket	Hanoi	Cau Giay	Su02	2018-07-30	senterica	Unknown	Anatum	64	10	14	15	31	25	20	33
SP3	SafePORK	Supermarket	Hanoi	Cau Giay	Su02	2018-07-30	senterica	Unknown	potential monophasic variant of Typhimurium	36	18	14	12	9	5	18	21
SP4	SafePORK	Supermarket	Hanoi	Cau Giay	Su02	2018-07-30	senterica	Unknown	Stanley	29	16	16	20	18	8	12	18
SP5	SafePORK	Supermarket	Hanoi	Cau Giay	Su02	2018-07-30	senterica	Unknown	Anatum	64	10	14	15	31	25	20	33
SP6	SafePORK	Supermarket	Hanoi	Cau Giay	Su05	2018-07-30	senterica	Unknown	Typhimurium	19	10	7	12	9	5	9	2
SP7	SafePORK	Supermarket	Hanoi	Cau Giay	Su05	2018-07-30	senterica	Unknown	potential monophasic variant of Typhimurium	36	18	14	12	9	5	18	21
SP9	SafePORK	Supermarket	Hanoi	Cau Giay	Su05	2018-07-30	senterica	Unknown	Derby	40	19	20	3	20	5	22	22
SP19	SafePORK	Supermarket	Hanoi	Cau Giay	Su05	2018-07-30	senterica	Unknown	Goldcoast or Brikama*	358	5	110	35	122	2	19	22
SP22	SafePORK	Convenience store	Hanoi	Cau Giay	C03	2018-08-02	senterica	Unknown	Anatum	64	10	14	15	31	25	20	33
SP28	SafePORK	Convenience store	Hanoi	Cau Giay	C03	2018-08-02	senterica	Unknown	Give	516	84	11	16	42	40	71	4
SP30	SafePORK	Convenience store	Hanoi	Cau Giay	C04	2018-08-02	senterica	Unknown	Newport	46	10	7	21	12	15	12	12
SP35	SafePORK	Convenience store	Hanoi	Cau Giay	C01	2018-08-02	senterica	Unknown	Weltevreden	365	130	97	25	125	84	9	101
SP44	SafePORK	Convenience store	Hanoi	Cau Giay	C01	2018-08-02	senterica	Unknown	Rissen	469	92	107	79	156	64	151	87
SP46	SafePORK	Convenience store	Hanoi	Cau Giay	C05	2018-08-02	senterica	Unknown	Newport*	46	10	7	21	12	15	12	12
SP52	SafePORK	Convenience store	Hanoi	Cau Giay	C05	2018-08-02	senterica	Unknown	Newport*	46	10	7	21	12	15	12	12
SP90	SafePORK	Supermarket	Hanoi	Cau Giay	Su04	2018-08-02	senterica	Unknown	Meleagridis	463	92	125	78	128	138	9	141
SP97	SafePORK	Supermarket	Hanoi	Cau Giay	Su04	2018-08-02	senterica	Unknown	Stanley	29	16	16	20	18	8	12	18
SP100	SafePORK	Supermarket	Hanoi	Cau Giay	Su04	2018-08-02	senterica	Unknown	London	155	10	60	58	66	6	65	16
SP108	SafePORK	Supermarket	Hanoi	Cau Giay	Su06	2018-08-02	senterica	Unknown	II 9,12:l,z28:1,5 or Javiana*	437	13	12	63	16	13	16	4
SP117	SafePORK	Supermarket	Hanoi	Cau Giay	Su06	2018-08-02	senterica	Unknown	Agona	13	3	3	7	4	3	3	7
SP125	SafePORK	Supermarket	Hanoi	Cau Giay	Su06	2018-08-02	senterica	Unknown	Anatum	64	10	14	15	31	25	20	33
SP130	SafePORK	Supermarket	Hanoi	Cau Giay	Su06	2018-07-30	senterica	Unknown	Meleagridis	463	92	125	78	128	138	9	141
SP136	SafePORK	Supermarket	Hanoi	Cau Giay	Su03	2018-07-30	senterica	Unknown	London	155	10	60	58	66	6	65	16
SP140	SafePORK	Supermarket	Hanoi	Cau Giay	Su03	2018-07-30	senterica	Unknown	Typhimurium	19	10	7	12	9	5	9	2
SP141	SafePORK	Supermarket	Hanoi	Cau Giay	Su01	2018-07-30	senterica	Unknown	London	155	10	60	58	66	6	65	16
SP147	SafePORK	Supermarket	Hanoi	Cau Giay	Su01	2018-07-30	senterica	Unknown	Rissen	469	92	107	79	156	64	151	87
SP152	SafePORK	Supermarket	Hanoi	Cau Giay	Su01	2018-07-30	senterica	Unknown	Anatum	64	10	14	15	31	25	20	33
SP157	SafePORK	Convenience store	Hanoi	Cau Giay	C02	2018-07-30	senterica	Rissen	Rissen	469	92	107	79	156	64	151	87
SP164	SafePORK	Convenience store	Hanoi	Cau Giay	C02	2018-08-02	senterica	Unknown	Derby	40	19	20	3	20	5	22	22
SP168	SafePORK	Supermarket	Hanoi	Cau Giay	Su04	2018-08-02	senterica	Unknown	London	155	10	60	58	66	6	65	16
HBT03-001	SafePORK	Boutique store	Hanoi	Hai Ba Trung	B07	2019-03-04	senterica	Rissen	Rissen	469	92	107	79	156	64	151	87
HBT03-002	SafePORK	Boutique store	Hanoi	Hai Ba Trung	B07	2019-03-04	senterica	Bareilly	Bareilly	909	81	283	101	12	124	130	17
HBT03-005	SafePORK	Boutique store	Hanoi	Hai Ba Trung	B09	2019-03-04	senterica	Bareilly	Bareilly	909	81	283	101	12	124	130	17
HBT03-008	SafePORK	Boutique store	Hanoi	Hai Ba Trung	B15	2019-03-04	senterica	Derby	Derby	40	19	20	3	20	5	22	22
HBT03-009	SafePORK	Boutique store	Hanoi	Hai Ba Trung	B12	2019-03-04	senterica	Rissen	Rissen	469	92	107	79	156	64	151	87
HBT03-010	SafePORK	Boutique store	Hanoi	Hai Ba Trung	B12	2019-03-04	senterica	Rissen	Rissen	469	92	107	79	156	64	151	87
HBT03-014	SafePORK	Boutique store	Hanoi	Hai Ba Trung	B13	2019-03-04	senterica	Derby	Derby	40	19	20	3	20	5	22	22
HBT03-016	SafePORK	Boutique store	Hanoi	Hai Ba Trung	B14	2019-03-04	senterica	Derby	Derby	40	19	20	3	20	5	22	22
HBT03-017	SafePORK	Boutique store	Hanoi	Hai Ba Trung	B14	2019-03-04	senterica	London	London	155	10	60	58	66	6	65	16
HBT03-018	SafePORK	Boutique store	Hanoi	Hai Ba Trung	B14	2019-03-04	senterica	Anatum	Anatum	64	10	14	15	31	25	20	33
HD03-005	SafePORK	Boutique store	Hanoi	Ha Dong	B04	2019-04-10	senterica	Typhimurium	Typhimurium	34	10	19	12	9	5	9	2
BD03-001	SafePORK	Boutique store	Hanoi	Ba Dinh	B02	2019-03-21	senterica	Anatum	Anatum	64	10	14	15	31	25	20	33
DD03-002	SafePORK	Boutique store	Hanoi	Dong Da	B05	2019-03-14	senterica	Bareilly	Bareilly	909	81	283	101	12	124	130	17
HD03-001	SafePORK	Boutique store	Hanoi	Ha Dong	B11	2019-04-10	senterica	Newport	Newport	31	2	2	15	14	15	20	12
HD03-009	SafePORK	Boutique store	Hanoi	Ha Dong	B11	2019-04-10	senterica	Unknown	Paratyphi B	42	20	4	23	14	16	19	18
BD03-005	SafePORK	Boutique store	Hanoi	Ba Dinh	B03	2019-03-21	senterica	Weltevreden	Weltevreden	365	130	97	25	125	84	9	101
HD03-003	SafePORK	Boutique store	Hanoi	Ha Dong	B06	2019-04-10	senterica	Unknown	Corvallis/Chailey	1541	197	187	10	234	8	65	22
HD03-013	SafePORK	Boutique store	Hanoi	Ha Dong	B08	2019-04-10	senterica	Rissen	Rissen	469	92	107	79	156	64	151	87
BD03-007	SafePORK	Boutique store	Hanoi	Ba Dinh	B01	2019-03-21	senterica	Agona	Agona	13	3	3	7	4	3	3	7
DD03-003	SafePORK	Boutique store	Hanoi	Dong Da	B10	2019-03-14	senterica	Rissen	Rissen	469	92	107	79	156	64	151	87
